# Supplementary material
Source: publisher figshare collection journal article supplement (https://frontiersin.figshare.com/ndownloader/files/14081120)
Supplement: Supplementary file [file 14081120]

## Supplementary Material

# Test-retest reliability of diffusion measures extracted along white matter language fiber bundles using HARDI-based tractography

Mariem Boukadi, Karine Marcotte, Christophe Bedetti, Jean-Christophe Houde, Alex Desautels, Samuel Deslauriers-Gauthier, Marianne Chapleau, Arnaud Boré, Maxime Descoteaux, & Simona M. Brambati\*

\* **Correspondence:** Simona M. Brambati: [simona.maria.brambati@umontreal.ca](mailto:simona.maria.brambati@umontreal.ca)

## Supplementary Figures

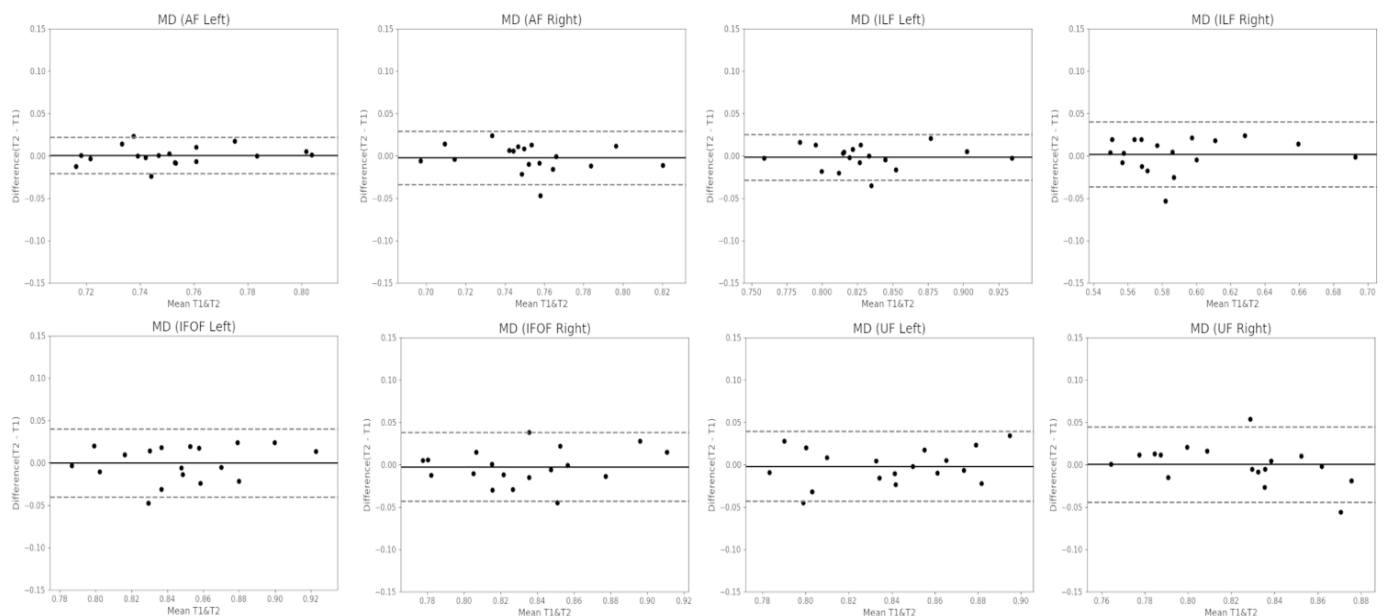

**Supplementary Figure 1.** Bland-Altman Plots for the MD metric in all four fiber bundles, bilaterally. The Y axis represents the mean difference between the measurements at the two timepoints and the X axis represents the mean of these measures. The upper and lower dashed lines represent the two limits of agreements at  $\pm 2$  standard-deviations of the mean of differences (i.e. the 95% confidence interval). The solid line represents the mean of the differences between the two timepoints. The dots represent the individual subjects. MD = mean diffusivity; AF = arcuate fasciculus; ILF = inferior longitudinal fasciculus; IFOF = inferior fronto-occipital fasciculus; UF = uncinate fasciculus; T1 = time 1; T2 = time 2.

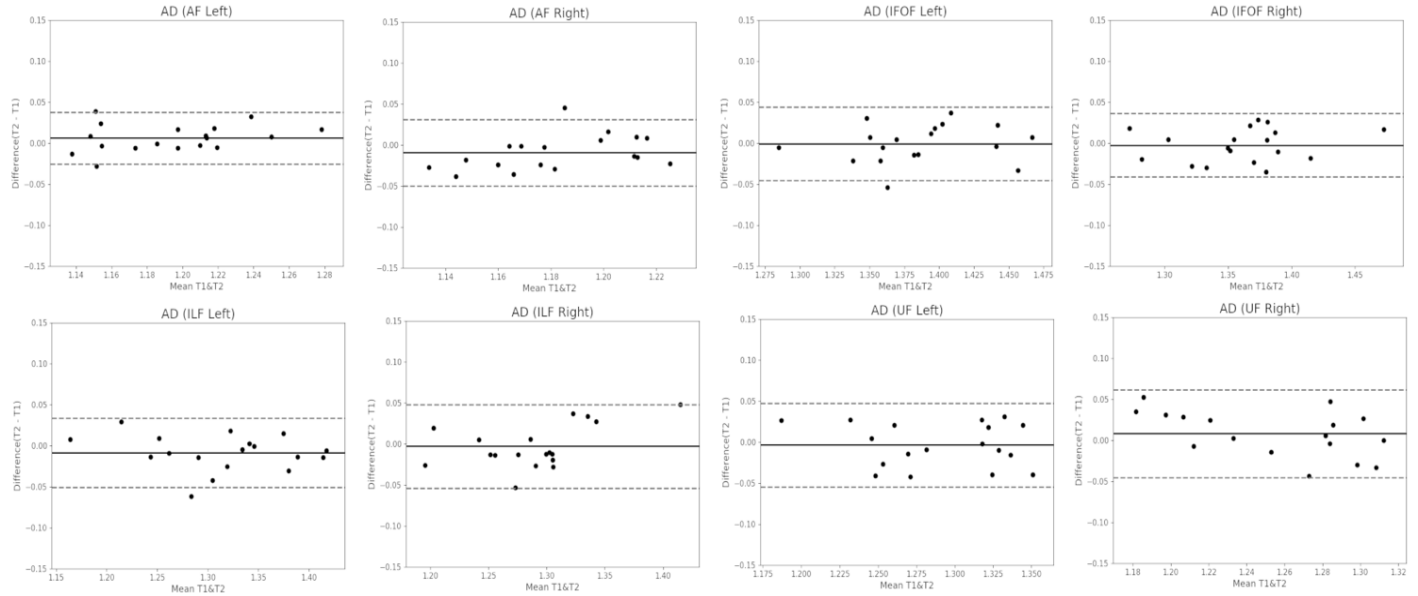

**Supplementary figure 2.** Bland-Altman Plots for the AD metric in all four fiber bundles, bilaterally. The Y axis represents the mean difference between the measurements at the two timepoints and the X axis represents the mean of these measures. The upper and lower dashed lines represent the two limits of agreements at  $\pm 2$  standard-deviations of the mean of differences (i.e. the 95% confidence interval). The solid line represents the mean of the differences between the two timepoints. The dots represent the individual subjects. AD = axial diffusivity; AF = arcuate fasciculus; ILF = inferior longitudinal fasciculus; IFOF = inferior fronto-occipital fasciculus; UF = uncinate fasciculus; T1 = time 1; T2 = time 2.

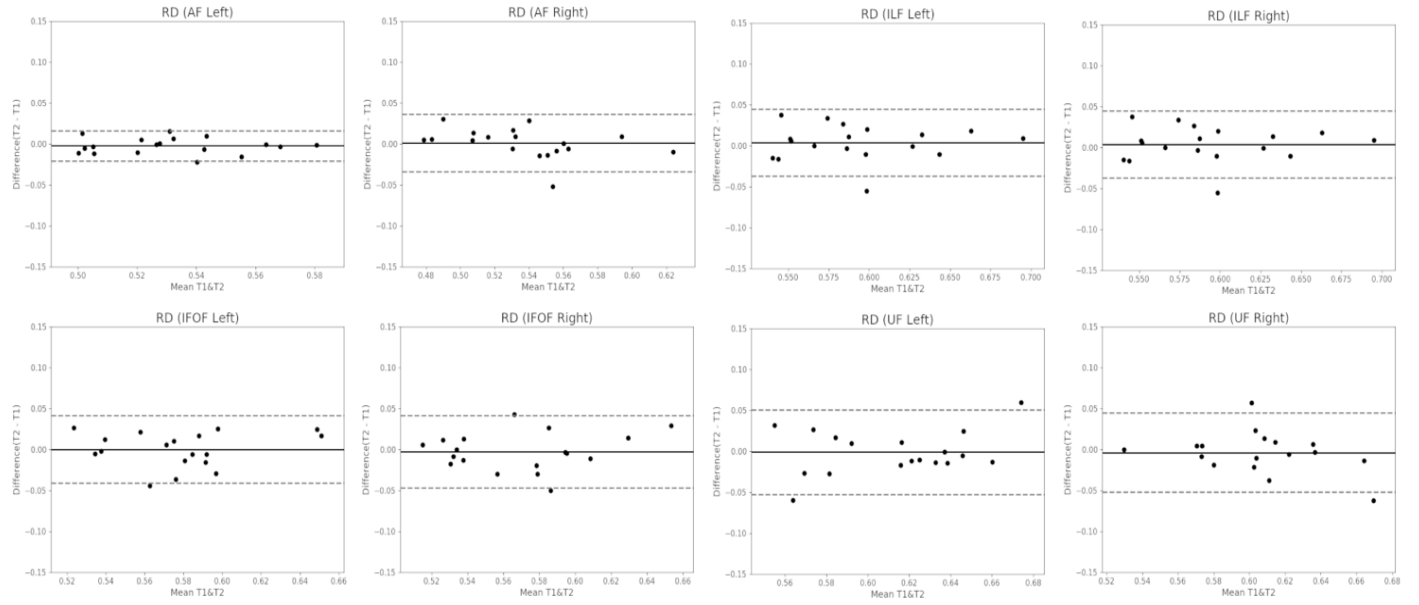

**Supplementary figure 3.** Bland-Altman Plots for the RD metric in all four fiber bundles, bilaterally. The Y axis represents the mean difference between the measurements at the two timepoints and the X axis represents the mean of these measures. The upper and lower dashed lines represent the two limits of agreements at  $\pm 2$  standard-deviations of the mean of differences (i.e. the 95% confidence interval). The solid line represents the mean of the differences between the two timepoints. The dots represent the individual subjects. RD = radial diffusivity; AF = arcuate fasciculus; ILF = inferior longitudinal fasciculus; IFOF = inferior fronto-occipital fasciculus; UF = uncinate fasciculus; T1 = time 1; T2 = time 2.

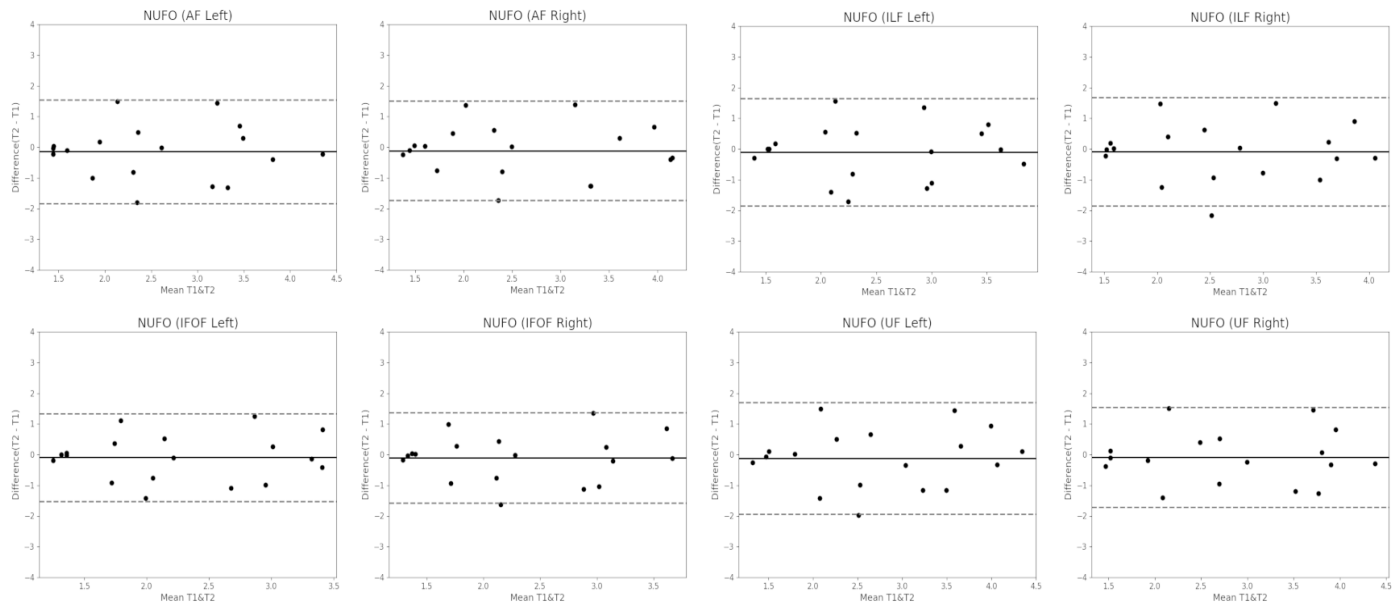

**Supplementary figure 4.** Bland-Altman Plots for the NuFO measure in all four fiber bundles, bilaterally. The Y axis represents the mean difference between the measurements at the two timepoints and the X axis represents the mean of these measures. The upper and lower dashed lines represent the two limits of agreements at  $\pm 2$  standard-deviations of the mean of differences (i.e. the 95% confidence interval). The solid line represents the mean of the differences between the two timepoints. The dots represent the individual subjects. NuFO = Number of fiber orientations; AF = arcuate fasciculus; ILF = inferior longitudinal fasciculus; IFOF = inferior fronto-occipital fasciculus; UF = uncinate fasciculus; T1 = time 1; T2 = time 2.

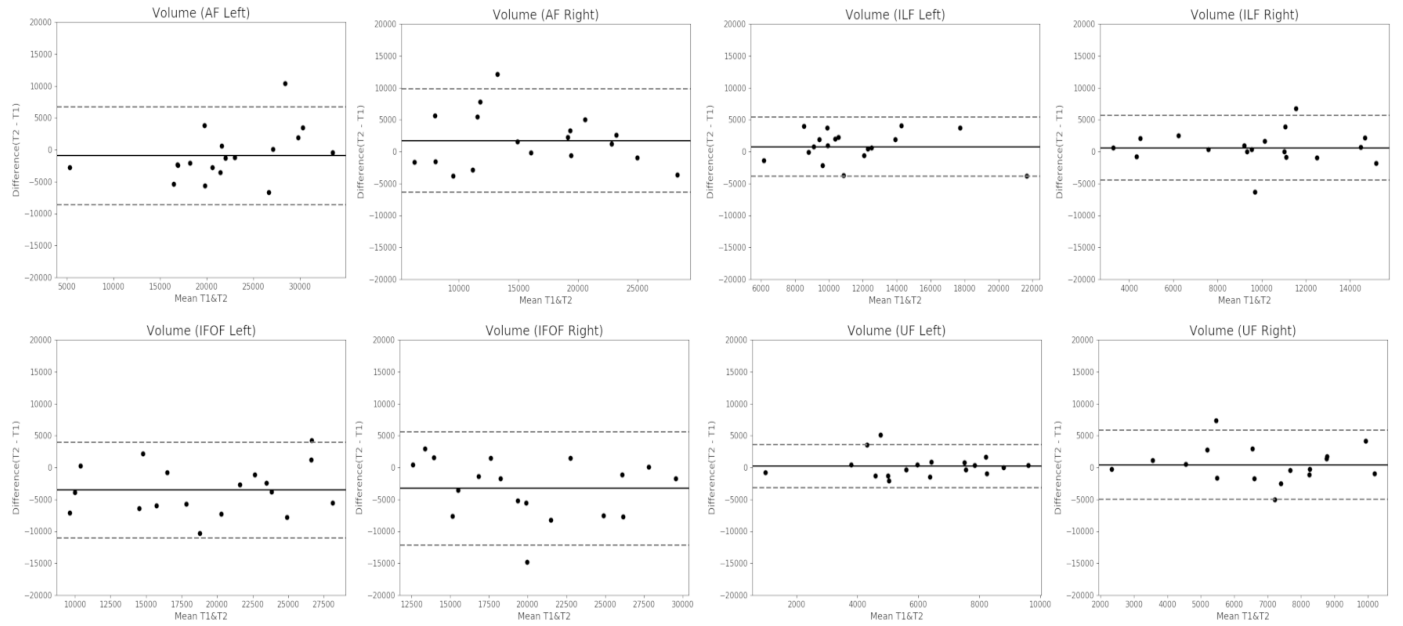

**Supplementary figure 5.** Bland-Altman Plots for the Volume measure in all four fiber bundles, bilaterally. The Y axis represents the mean difference between the measurements at the two timepoints and the X axis represents the mean of these measures. The upper and lower dashed lines represent the two limits of agreements at  $\pm 2$  standard-deviations of the mean of differences (i.e. the 95% confidence interval). The solid line represents the mean of the differences between the two timepoints. The dots represent the individual subjects. AF = arcuate fasciculus; ILF = inferior longitudinal fasciculus; IFOF = inferior fronto-occipital fasciculus; UF = uncinate fasciculus; T1 = time 1; T2 = time 2.

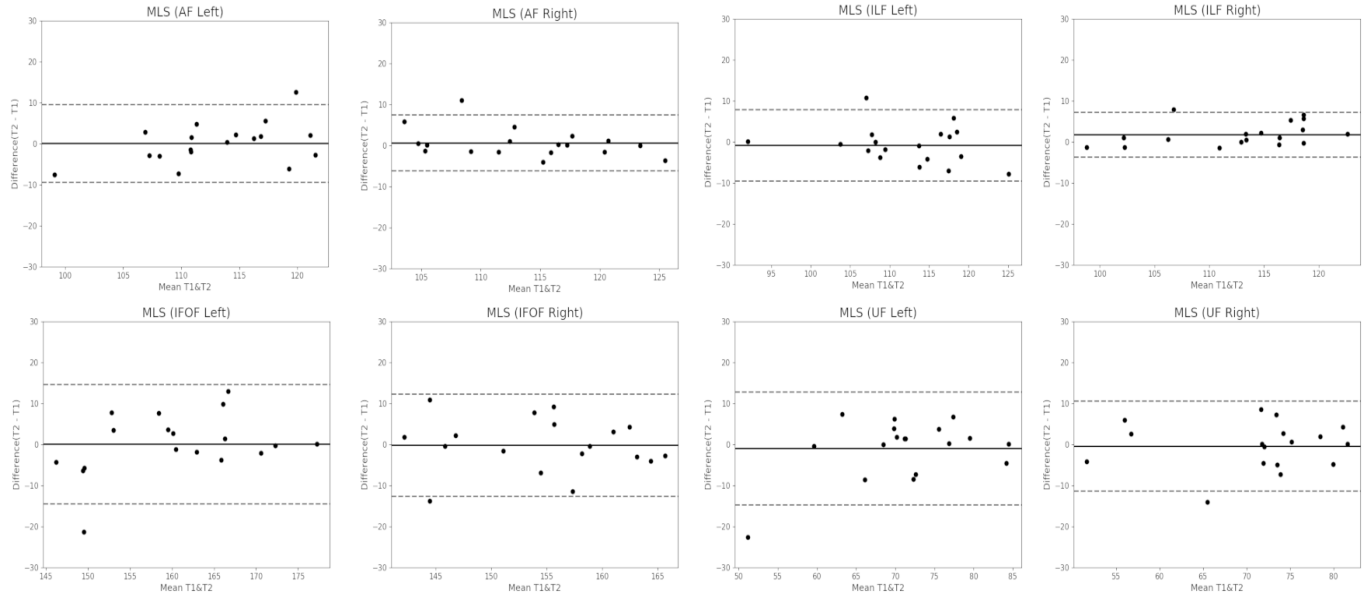

**Supplementary figure 6.** Bland-Altman Plots for the MLS measure in all four fiber bundles, bilaterally. The Y axis represents the mean difference between the measurements at the two timepoints and the X axis represents the mean of these measures. The upper and lower dashed lines represent the two limits of agreements at  $\pm 2$  standard-deviations of the mean of differences (i.e. the 95% confidence interval). The solid line represents the mean of the differences between the two timepoints. The dots represent the individual subjects. MLS = mean length of streamlines; AF = arcuate fasciculus; ILF = inferior longitudinal fasciculus; IFOF = inferior fronto-occipital fasciculus; UF = uncinate fasciculus; T1 = time 1; T2 = time 2.
